# Supplementary material for: Flexibility-driven 1D-structural preference in a bis-terpyridine-Fe(ii)-metallo-supramolecular polymer possessing potential tricolor electrochromism
Source: Royal Society of Chemistry journal article supplement (doi:10.1039/d2py01557a), 2023-01-01
Supplement: d2py01557a1.pdf [file d2py01557a1.pdf]

**Flexibility-driven 1D-structural preference in *bis*-terpyridine-Fe(II)-  
Metallo-supramolecular polymer possessing potential tricolor  
electrochromism**

*Shivani Tripathi, # Sayan Halder, # Banchhanidhi Prusti, Chanchal Chakraborty\* and Manab  
Chakravarty \**

Department of Chemistry, Birla Institute of Technology and Science (BITS) Pilani,  
Hyderabad Campus, Jawahar Nagar, Shameerpet Mandal, Hyderabad-500078, India

Emails-

# Content

1. DFT Optimised structure of **DPATPY** (Fig.S1)
2. FT-IR spectrum of **DPATPY** (Fig.S2)
3. FT-IR spectrum of **FeDPATPY** (Fig.S3)
4. Comparative spectra of **DPATPY** and **FeDPATPY** (Fig.S4)
5. <sup>1</sup>HNMR spectrum of **N-heptyl diphenylamine (1)** (Fig.S5)
6. <sup>13</sup>C NMR spectrum of **N-heptyl diphenylamine (1)** (Fig.S6)
7. <sup>1</sup>HNMR spectrum of **N-heptyl DPA dialdehyde (2)** (Fig.S7)
8. <sup>13</sup>CNMR spectrum of **N-heptyl DPA dialdehyde (2)** (Fig.S8)
9. <sup>1</sup>HNMR spectrum of **DPATPY** (Fig.S9)
10. <sup>13</sup>CNMR spectrum of **DPATPY** (Fig.S10)
11. ESI-MS spectrum of **DPATPY** (Fig.S11)
12. <sup>1</sup>HNMR spectrum of **FeDPATPY** (Fig.S12)
13. Lifetime decay profile of **DPATPY** and **FeDPATPY** (Fig.S13)
14. Lifetime parameters (Table S1)
15. Crystallographic parameters of the ligand **DPATPY** (Table S2)
16. Cross-sectional SEM image to derive the **Fe-DPATPY** film thickness on ITO-coated glass. (Fig.S14)

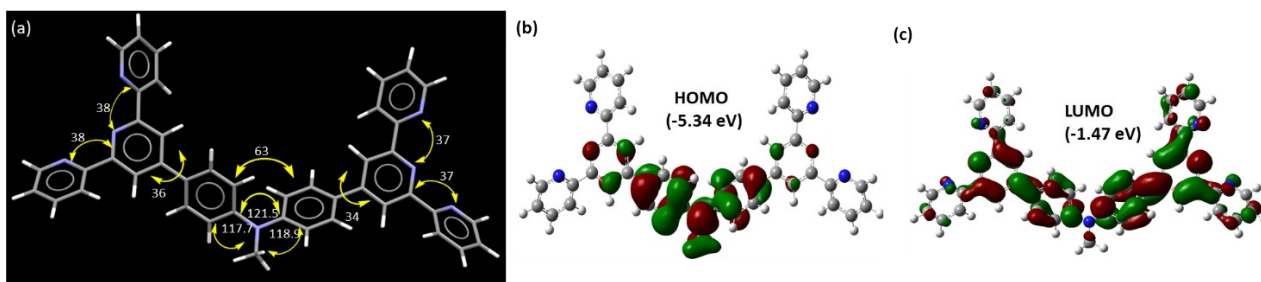

**Fig S1:** (a) DFT optimized structure using B3lyp/6-31g(d) functional; the angles ( $^{\circ}$ ) are determined using mercury software. For the simplicity of DFT calculation, the N-alkyl chain is truncated to N-Methyl. (b) HOMO (Highest occupied molecular orbital) (c) LUMO (Lowest unoccupied molecular orbital) with their individual energy in eV for DPATPY.

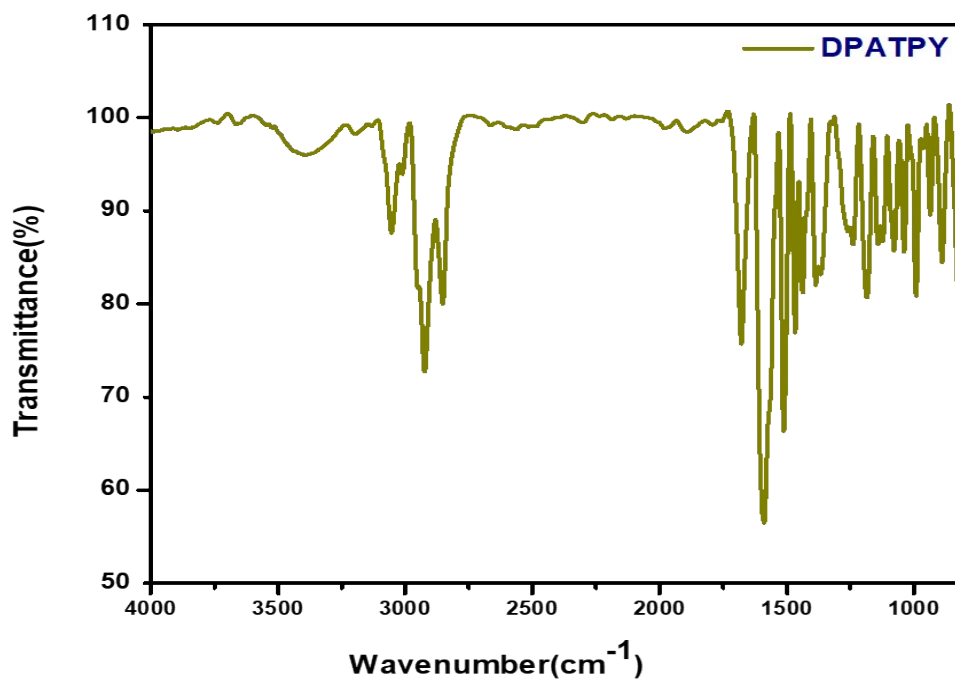

**Fig. S2:** FT-IR spectrum of DPATPY

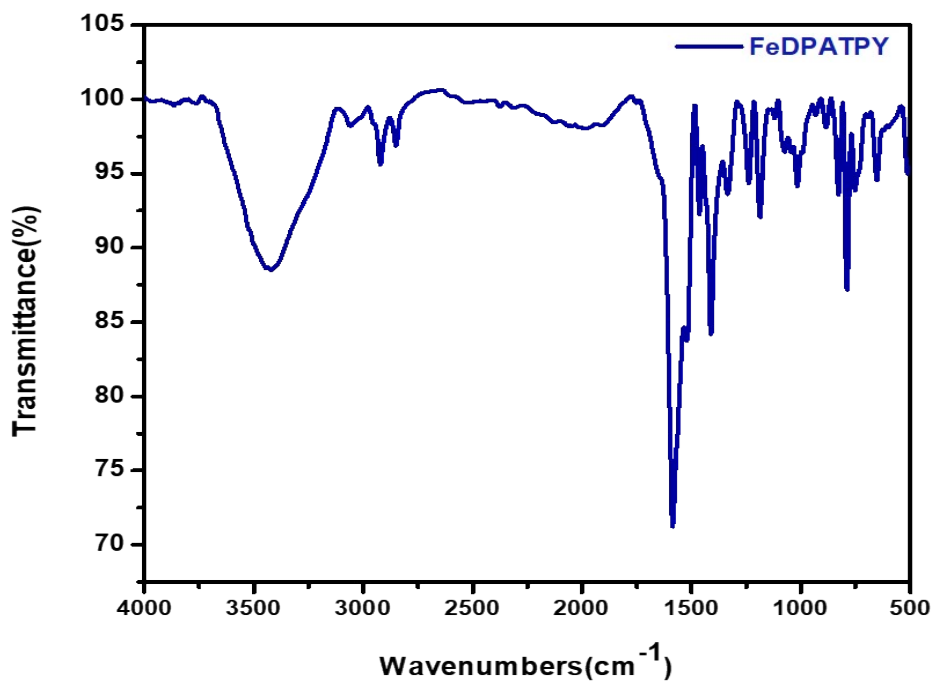

**Fig. S3:** FT-IR spectrum of Fe-DPATPY

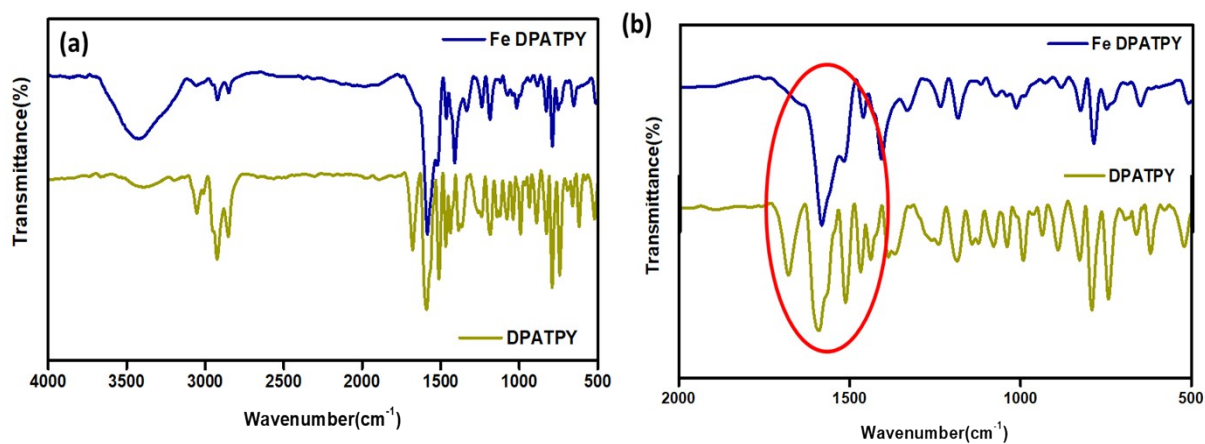

**Fig. S4:** Comparative FT-IR spectra of DPATPY and Fe-DPATPY (a) Full IR spectra (b) expanded spectra from 2000 to 500  $\text{cm}^{-1}$ .

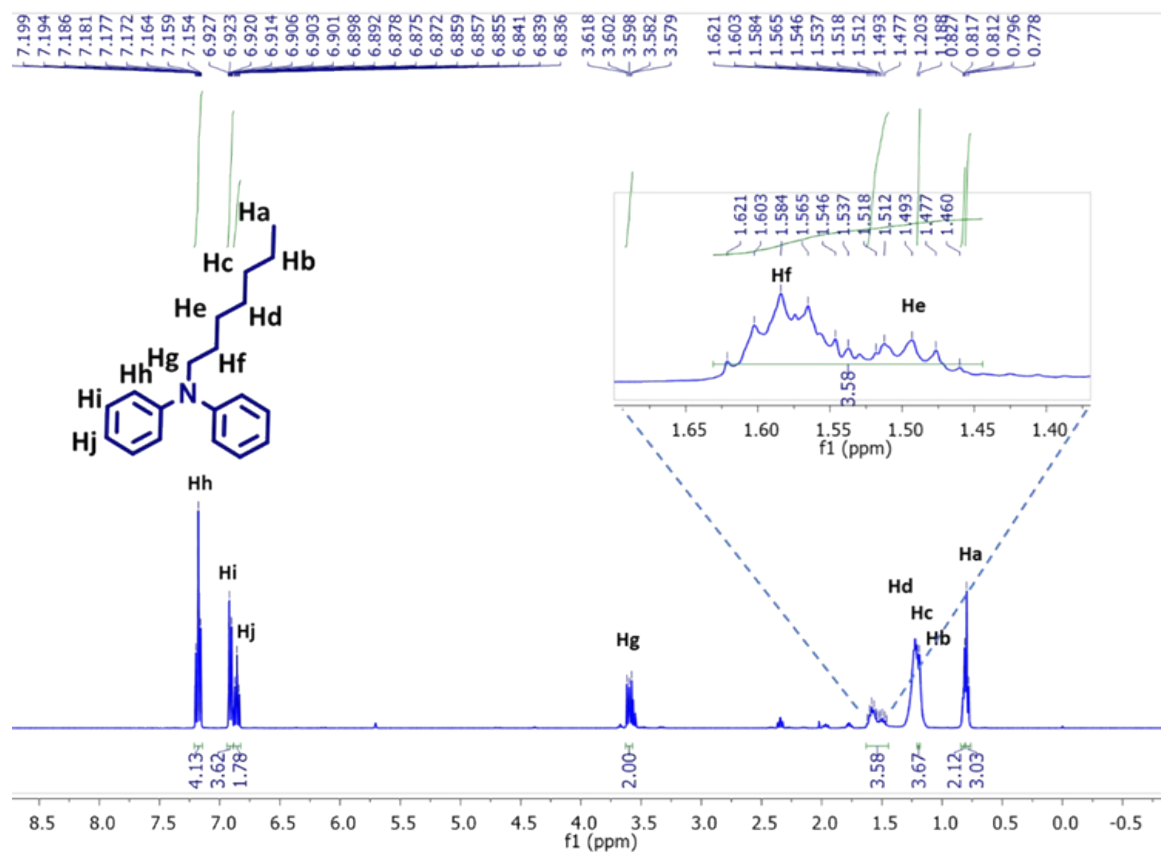

**Fig.S5:**  $^1\text{H}$  NMR spectrum of N-heptyl diphenylamine (1) in  $\text{CDCl}_3$

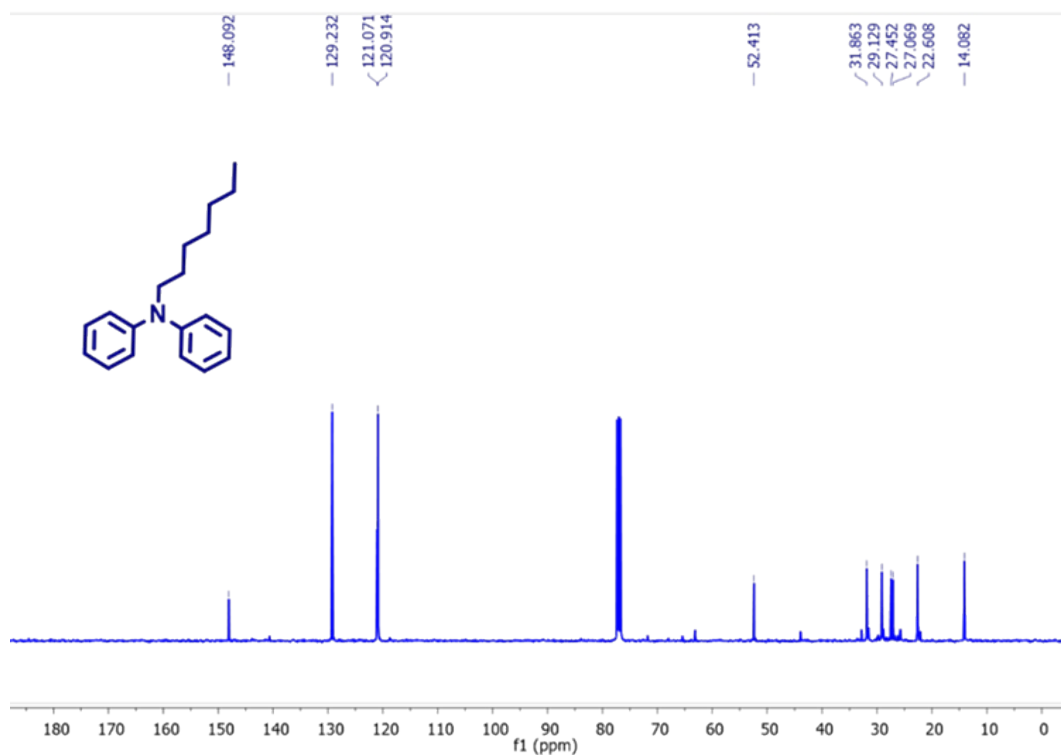

**Fig.S6:**  $^{13}\text{C}$  NMR spectrum of N-heptyl diphenylamine (1) in  $\text{CDCl}_3$

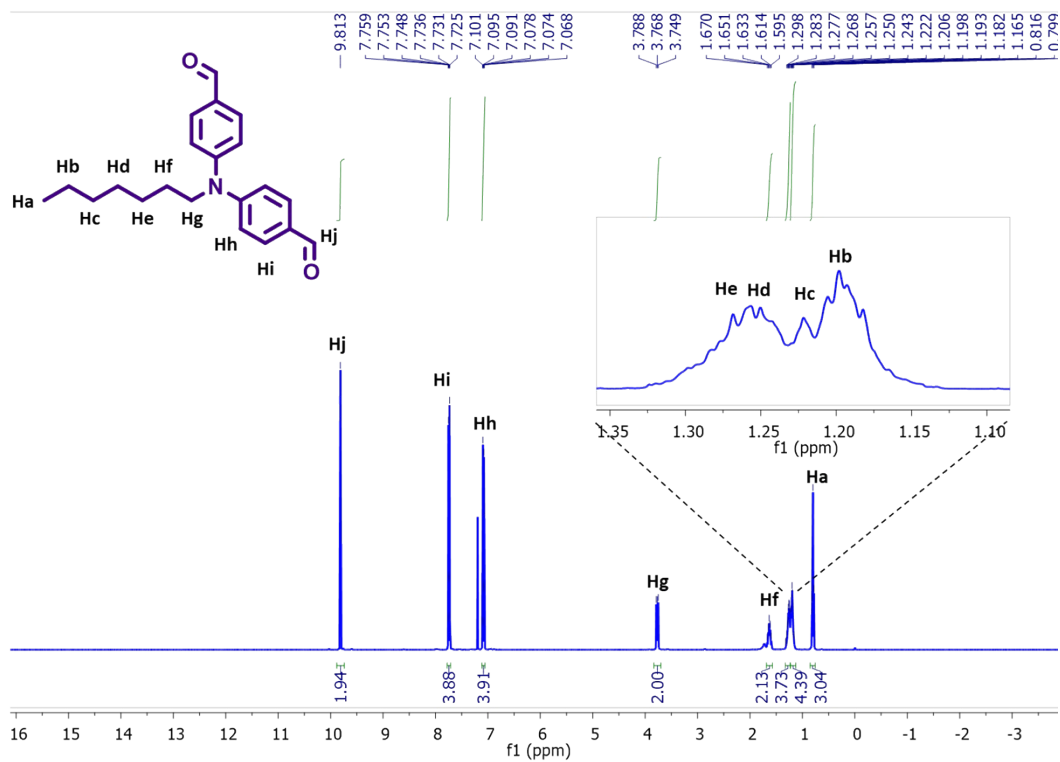

**Fig.S7:**  $^1\text{H}$  NMR of N-heptyl DPA dialdehyde; **DPACHO** in  $\text{CDCl}_3$

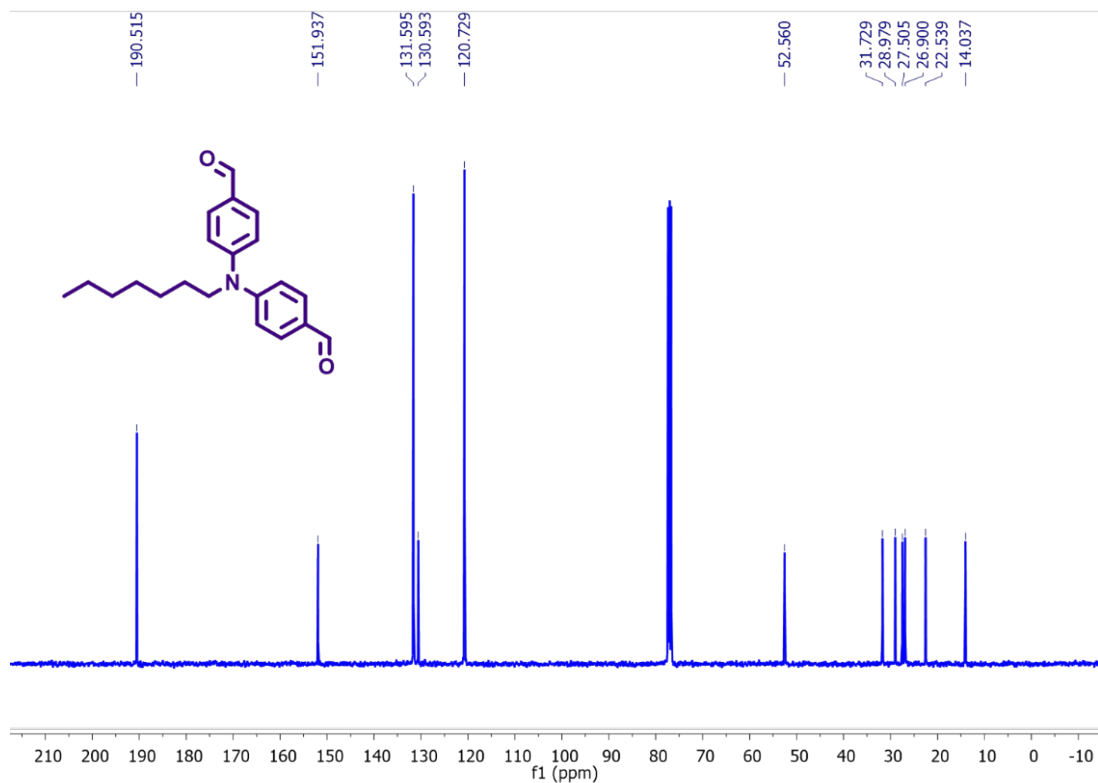

**Fig.S8:**  $^{13}\text{C}$ -NMR of N-heptyl DPA dialdehyde; **DPACHO** in  $\text{CDCl}_3$

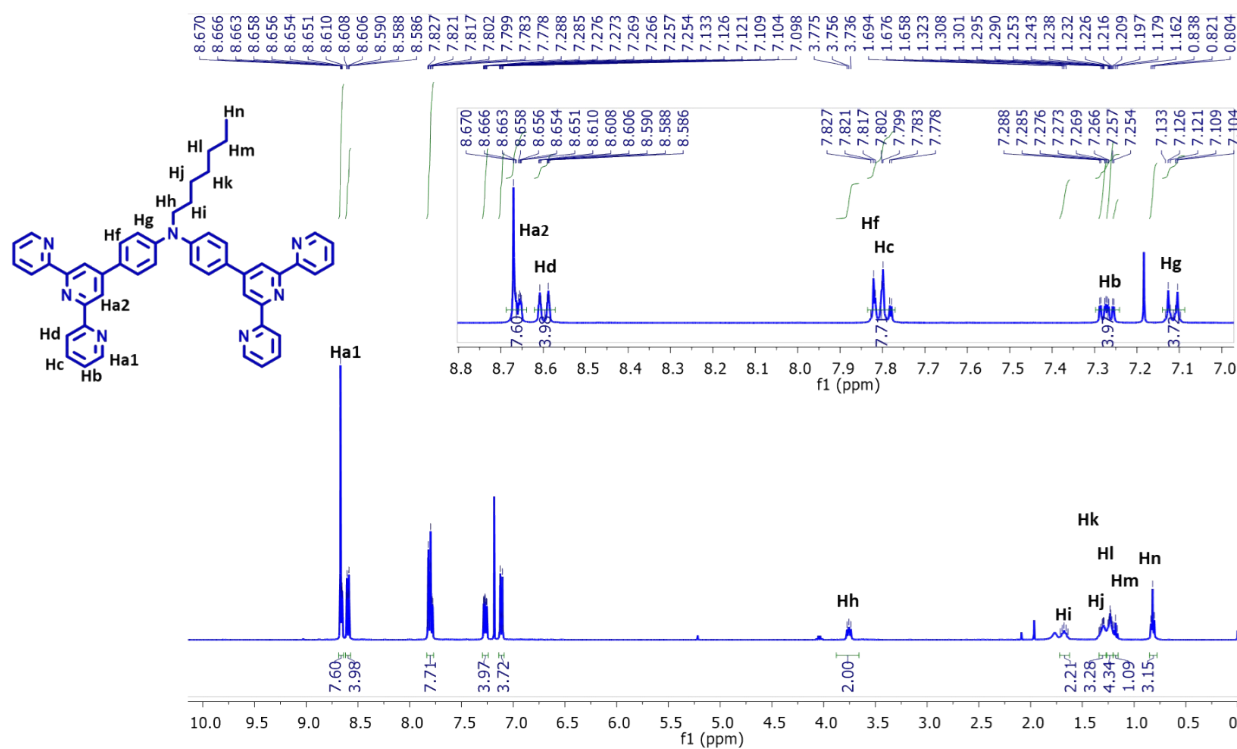

Fig. S9: <sup>1</sup>H-NMR spectrum of DPATPY in CDCl<sub>3</sub>.

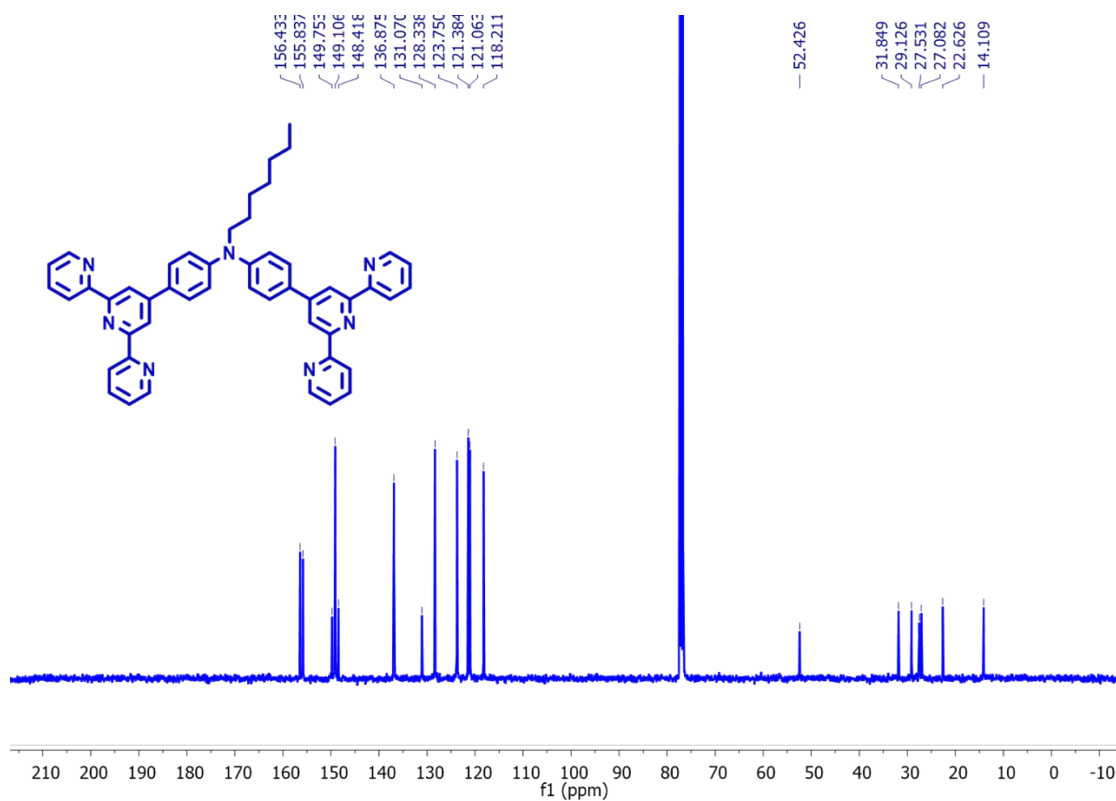

Fig. S10: <sup>13</sup>C-NMR spectrum of DPATPY in CDCl<sub>3</sub>.

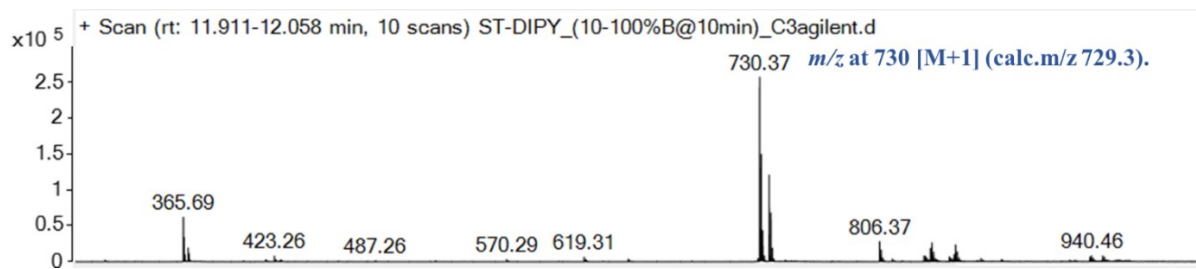

**Fig. S11:** ESI- MS spectrum of DPATPY

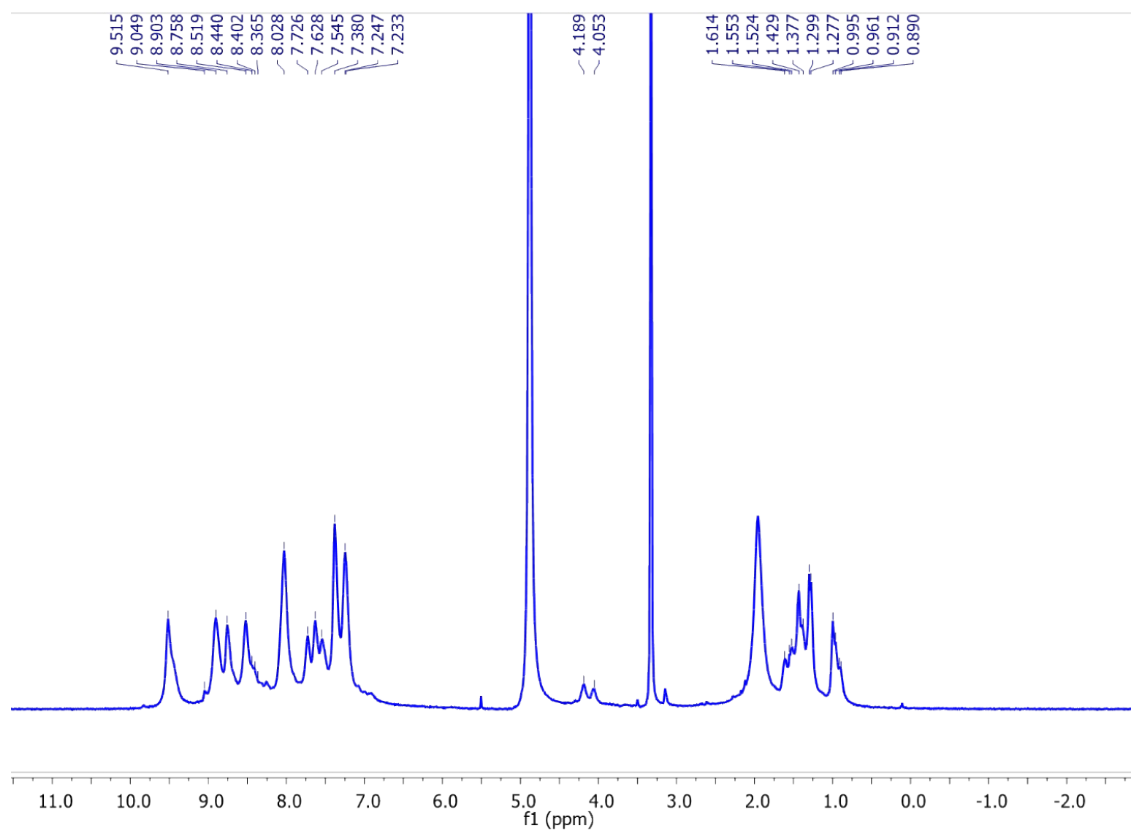

**Fig. S12:**  $^1\text{H}$  NMR spectrum of FeDPATPY in  $\text{CD}_3\text{OD}$



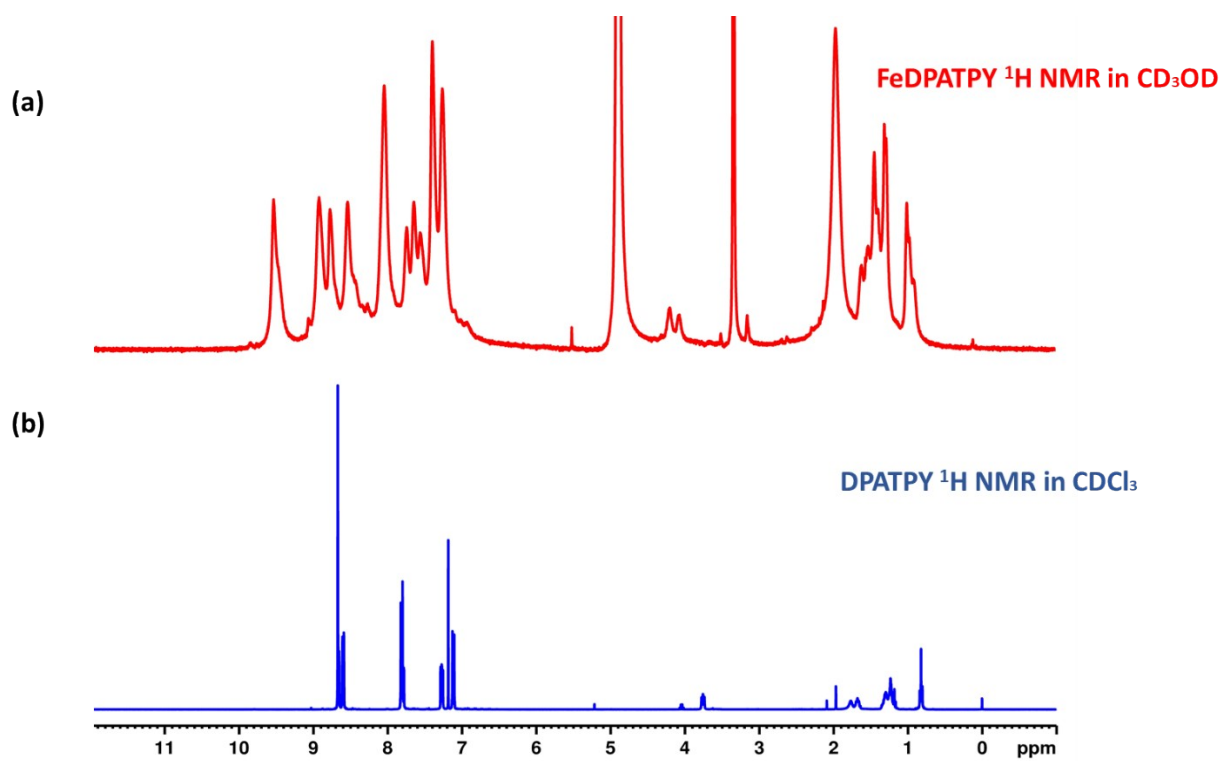

Fig. S12a:  $^1\text{H}$  NMR spectrum of (a) FeDPATPY in  $\text{CD}_3\text{OD}$  (b) DPATPY in  $\text{CDCl}_3$

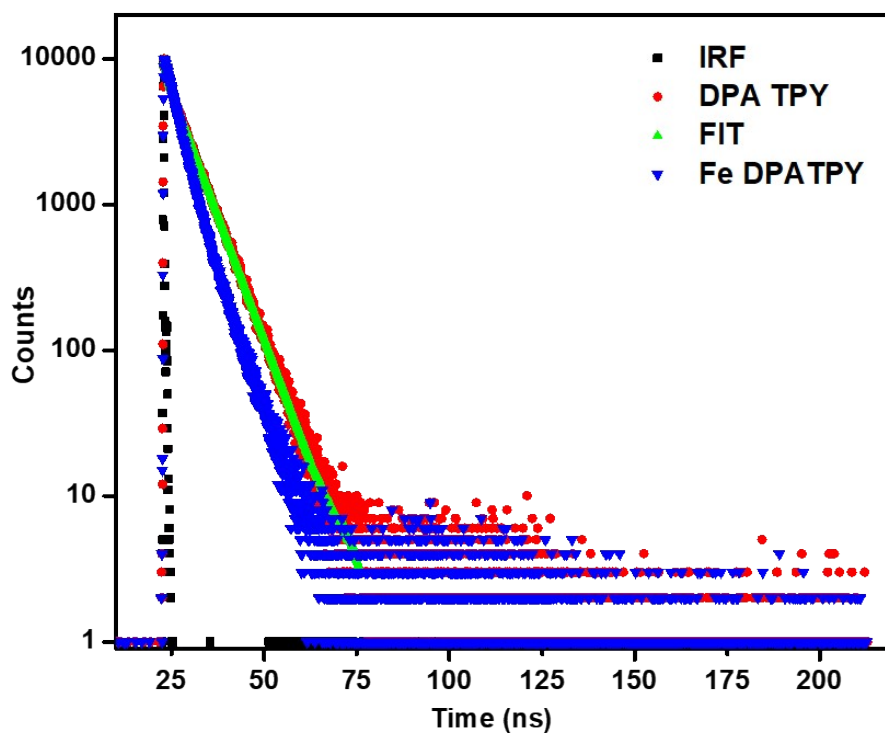

Fig. S13: Life Time decay profile of DPATPY and FeDPATPY

Table S1a: The lifetime parameters

| Samples | $\alpha_1$ | $\alpha_2$ | $\alpha_3$ | $\tau_1$ | $\tau_2$ | $\tau_3$ | $\chi^2$ | $\tau$ (ns) |
|---------|------------|------------|------------|----------|----------|----------|----------|-------------|
|---------|------------|------------|------------|----------|----------|----------|----------|-------------|

|                  |      |      |      |      |      |      |     |             |
|------------------|------|------|------|------|------|------|-----|-------------|
| <b>DPATPY</b>    | 0.34 | 0.66 | -    | 0.43 | 6.42 | -    | 1.2 | <b>6.22</b> |
| <b>Fe DPATPY</b> | 0.13 | 0.71 | 0.16 | 0.16 | 3.34 | 6.81 | 1.0 | <b>4.42</b> |

**Table S1b:** Other fluorescence parameters

| Samples  | $\lambda_{em}$ (nm) | $\Phi_f$ (%) | $\tau$ (ns) | $k_r$ ( $10^6 s^{-1}$ ) | $k_{nr}$ ( $10^8 s^{-1}$ ) |
|----------|---------------------|--------------|-------------|-------------------------|----------------------------|
| DPATPY   | 499                 | 2.5          | 6.22        | 4.02                    | 1.57                       |
| FeDPATPY | 482                 | 2.6          | 4.42        | 5.88                    | 2.20                       |

Where,  $\lambda_{em}$  = Emission maxima,  $\Phi_f$  = relative quantum yield,  $\tau$  = Fl. lifetime  $k_r$  = Radiative rate constant =  $\Phi_f / \tau$ ,  $k_{nr}$  = Nonradiative rate constant =  $(1/\tau) - k_r$

**Table S2:** All the crystallographic parameters of the ligand **DPATPY**

| Compounds                                                 | DPATPY                              |
|-----------------------------------------------------------|-------------------------------------|
| Emp. formula                                              | $C_{49}H_{43}N_7$                   |
| Formula weight                                            | 729.90                              |
| Crystal system                                            | monoclinic                          |
| Space group                                               | $P2_1/n$                            |
| $a/\text{\AA}$                                            | 14.5275(2)                          |
| $b/\text{\AA}$                                            | 8.93710(10)                         |
| $c/\text{\AA}$                                            | 31.1191(5)                          |
| $\alpha/^\circ$                                           | 90                                  |
| $\beta/^\circ$                                            | 102.802(2)                          |
| $\gamma/^\circ$                                           | 90                                  |
| Volume/ $\text{\AA}^3$                                    | 3939.87(10)                         |
| Z                                                         | 4                                   |
| $D_{calc}/g\text{ cm}^3$                                  | 1.231                               |
| $\mu/\text{mm}^{-1}$                                      | 0.573                               |
| F (000)                                                   | 1544.0                              |
| Data/restraints/parameters                                | 8357/0/506                          |
| S                                                         | 1.100                               |
| R1 [ $I \geq 2\sigma(I)$ ]                                | $R_1 = 0.0488$ ,<br>$wR_2 = 0.1338$ |
| wR2 [all data]                                            | $R_1 = 0.0558$ ,<br>$wR_2 = 0.1385$ |
| Max./min. residual electron dens. [ $e\text{ \AA}^{-3}$ ] | 0.23/-0.26                          |

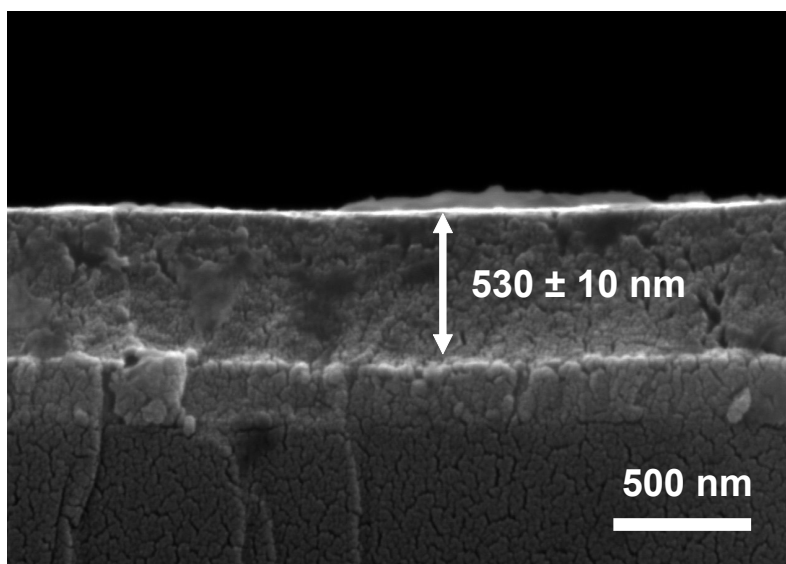

**Fig. S14:** Cross-sectional SEM image to derive the Fe-DPATPY film thickness on ITO-coated glass.

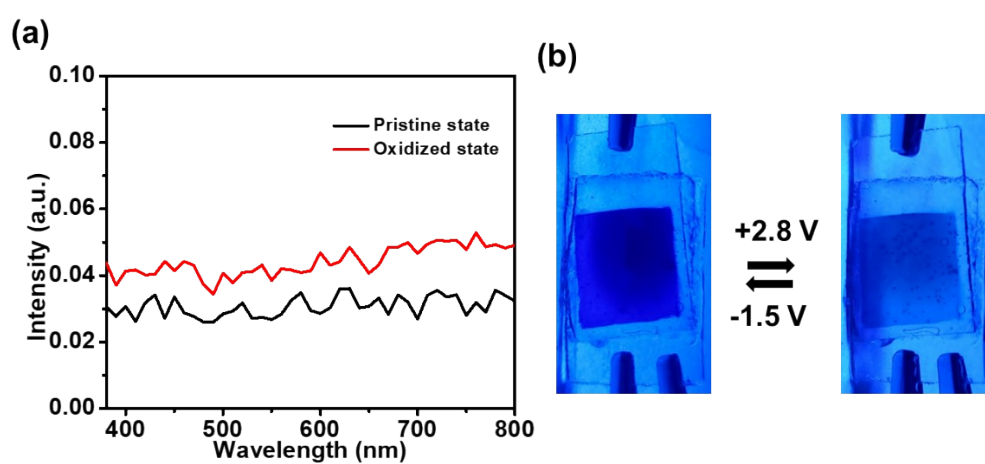

**Fig. S15.** (a) Emission spectra (excitation at 372 nm) and (b) the emission color change of the Fe-DPATPY-based ECD during the electrofluorochromism study. The photos are taken upon 365 nm UV-light irradiation.
